# Supplementary material
Source: Research Square preprint supplement (doi:10.21203/rs.3.rs-9131161/v1)
Supplement: Supplementary file 1 [file 03fcc5910ca361b15527c5bf.docx]

# SUPPLEMENTAL TABLES

**Supplemental Table 1. Strategic action schedule (intervention plan)**

| **Intervention Domain** | **Action** | **Timeline** | **Responsible Parties** |
| --- | --- | --- | --- |
| Clinical Care Improvement | Develop standardised asthma protocol | Months 12–24; ongoing updates per GINA | Clinical Quality Committee; PHC Management |
|  | Train staff (spirometry, inhaler technique, education) | Months 12–24; refreshers as guidelines update | Family Medicine Dept; CME Unit |
|  | Apply Kaizen/PDCA cycles to reduce care variability | Start month 4; review every 6 months | QI team; nursing & medical staff |
| Environmental Health Integration | Integrate air-pollution data with clinical asthma records | Every 6–12 months | Health IT; Environmental Public Authority |
|  | Develop asthma–air-quality dashboard with alerts | Months 12–24 | IT team; Public Health Unit |
| Community Engagement | Public awareness campaigns on environmental triggers; support road redesign | Seasonal/annual | Health Promotion Team; Municipality |
|  | Distribute educational materials via schools, clinics, social media | Annual (ongoing) | Community health workers; clinic staff |

**Supplemental Table 2. Implementation barriers and adaptations**

| **Barrier** | **Adaptation** | **Effect** |
| --- | --- | --- |
| Limited availability of spirometry (PFT) equipment | Partnered with private donors and the cooperative society to fund and purchase devices | Enabled access to diagnostic testing and inclusion of lung function data |
| Inadequate staff training in asthma protocols and device use | Organised CME-certified workshops in collaboration with the Ministry of Health | Improved staff competence and adherence to standardised care |
| Lack of air quality data integration into clinical system | Collaborated with the Environmental Public Authority to access pollution data feeds | Allowed linkage of environmental exposure data with patient records |
| Resistance to traffic diversion for emission reduction | Formed the Study Area Asthma Task Force to build consensus and share accountability | Increased stakeholder buy-in for environmental interventions |
| Community under-awareness of asthma triggers (e.g., incense, smoking) | Launched culturally sensitive campaigns through schools, mosques, and social media | Enhanced public knowledge and engagement with prevention strategies |
| Difficulty sustaining educational momentum post-training | Established refresher training and peer coaching programme | Maintained consistent staff performance and reinforced protocol use |
| Absence of a baseline asthma registry | Created an electronic asthma case log linked to primary care files and monthly reporting | Standardised data collection and enabled monitoring of trends |

# SUPPLEMENTAL FIGURES

**Supplemental Figure 1. Framework for Kaizen-based continuous improvement in asthma services**

Overview of system, human resource, non-human resource, and environmental interventions implemented under the Plan–Do–Check–Act (PDCA) quality improvement cycle.


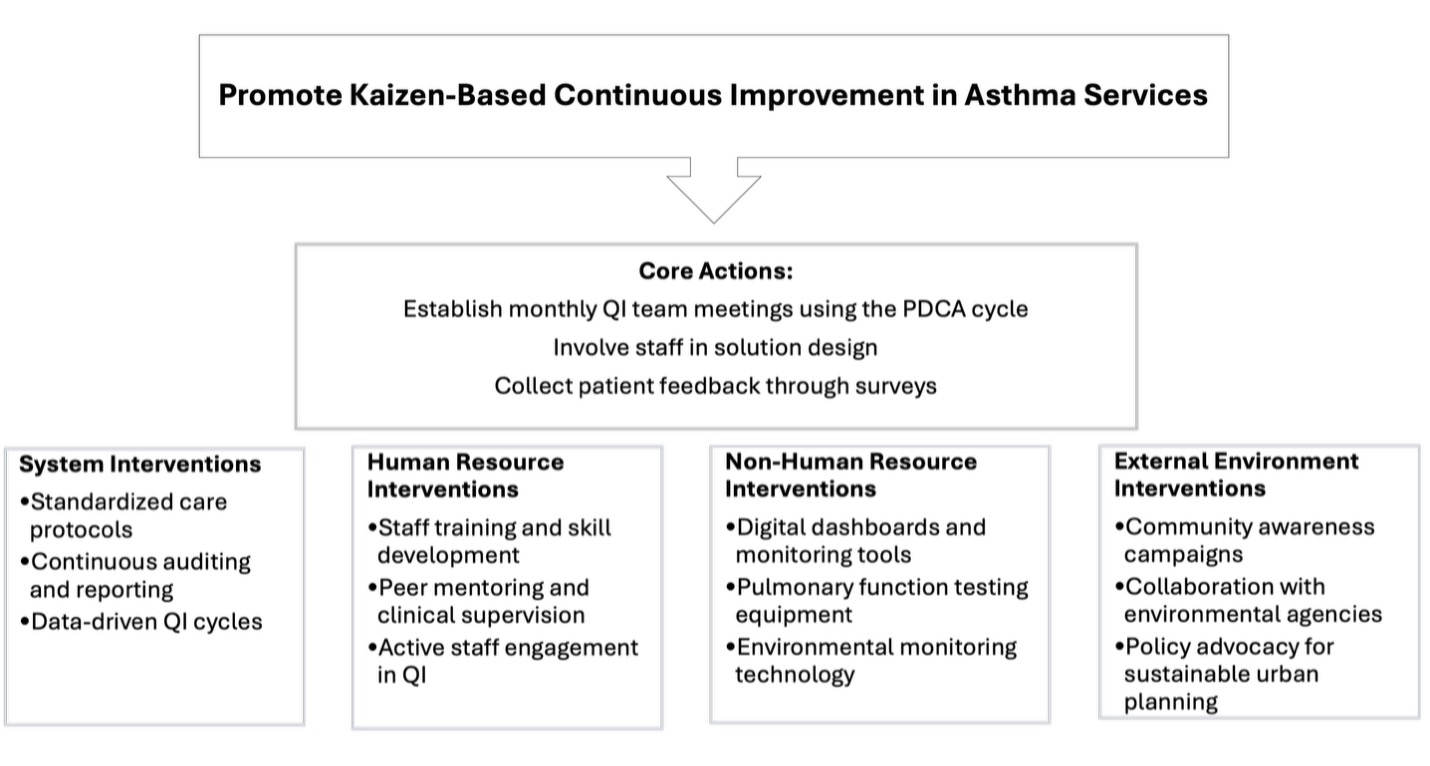


**Supplemental Figure 2. Traffic redesign and emission-reduction intervention around study clinic**


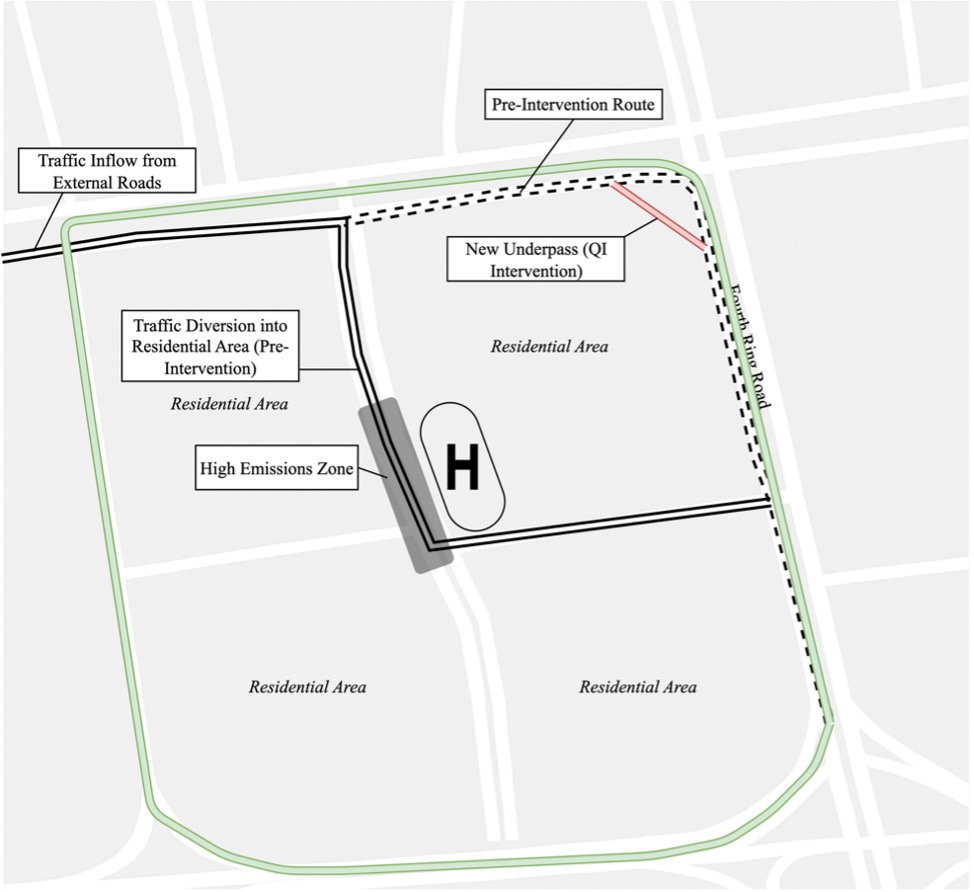


Map showing the highway underpass project (2015), which redirected traffic away from residential streets and the clinic zone to reduce local congestion and exposure to vehicle emissions.
